# Supplementary material for: Mathematical Model of the Firefly Luciferase Complementation Assay Reveals a Non-Linear Relationship between the Detected Luminescence and the Affinity of the Protein Pair Being Analyzed
Source: PLOS journal article supplement (doi:10.1371/journal.pone.0148256), 2016-02-17
Supplement: S7 (10.1371/journal.pone.0148256.s007) [file journal.pone.0148256.s007]

---

**Parameters Values from the Curve Fit.**

|          |             |                                              |                      |                |
|----------|-------------|----------------------------------------------|----------------------|----------------|
| $c_1$    | $K_{d,f}$   | Association of P53 and $MDM_2$               | $9.20 \cdot 10^6$    | $M^{-1}s^{-1}$ |
| $c_2$    | $K_{d,r}$   | Dissociation of P53 and $MDM_2$              | 2.00                 | $s^{-1}$       |
| $c_3$    | $ka_f$      | Association of $LH_2$ to NC Complex          | $1.84 \cdot 10^8$    | $M^{-1}s^{-1}$ |
| $c_4$    | $ka_r$      | Dissociation of $LH_2$ from NC Complex       | $3.00 \cdot 10^3$    | $s^{-1}$       |
| $c_5$    | $kl_f$      | Association of ATP to NC Complex             | $3.00 \cdot 10^7$    | $M^{-1}s^{-1}$ |
| $c_6$    | $kl_r$      | Dissociation of ATP from NC Complex          | $4.80 \cdot 10^3$    | $s^{-1}$       |
| $c_7$    | $kl_{f2}$   | Association of $LH_2$ to NFLuc               | $1.84 \cdot 10^8$    | $M^{-1}s^{-1}$ |
| $c_8$    | $kl_{r2}$   | Dissociation of $LH_2$ from NFLuc            | $5.05 \cdot 10^3$    | $s^{-1}$       |
| $c_9$    | $ka_{f2}$   | Association of ATP to NFLuc                  | $3.00 \cdot 10^7$    | $M^{-1}s^{-1}$ |
| $c_{10}$ | $ka_{r2}$   | Dissociation of ATP from NFLuc               | $2.05 \cdot 10^4$    | $s^{-1}$       |
| $c_{11}$ | $k_{Af}$    | Adenylation rate, forward, NC complex        | $5.01 \cdot 10^2$    | $s^{-1}$       |
| $c_{12}$ | $k_{Ar}$    | Adenylation rate, reverse, NC complex        | $1.08 \cdot 10^{-2}$ | $s^{-1}$       |
| $c_{13}$ | $k_{Af2}$   | Adenylation rate, forward, NFLuc             | $5.00 \cdot 10^{-2}$ | $s^{-1}$       |
| $c_{14}$ | $k_{Ar2}$   | Adenylation rate, reverse, NFLuc             | $1.10 \cdot 10^{-2}$ | $s^{-1}$       |
| $c_{15}$ | $kI_f$      | Association of Intermediate, NC complex      | $7.77 \cdot 10^7$    | $M^{-1}s^{-1}$ |
| $c_{16}$ | $kI_r$      | Dissociation of Intermediate, NC complex     | 3.47                 | $s^{-1}$       |
| $c_{17}$ | $kI_{f2}$   | Association of Intermediate, NFLuc           | $7.77 \cdot 10^7$    | $M^{-1}s^{-1}$ |
| $c_{18}$ | $kI_{r2}$   | Dissociation of Intermediate, NFLuc          | 3.47                 | $s^{-1}$       |
| $c_{19}$ | $k_{cat}$   | Oxidation Rate, NC complex                   | $2.1 \cdot 10^{-1}$  | $s^{-1}$       |
| $c_{20}$ | $k_{cat2}$  | Oxidation Rate, NFLuc                        | $4.00 \cdot 10^{-7}$ | $s^{-1}$       |
| $c_{21}$ | $ki_f$      | Association of Oxyluciferin to NC Complex    | $8.30 \cdot 10^6$    | $M^{-1}s^{-1}$ |
| $c_{22}$ | $ki_r$      | Dissociation of Oxyluciferin from NC Complex | $6.13 \cdot 10^{-1}$ | $s^{-1}$       |
| $c_{23}$ | $ki_{f2}^2$ | Association of L-AMP to NC Complex           | $5.00 \cdot 10^7$    | $M^{-1}s^{-1}$ |
| $c_{24}$ | $ki_{r2}^2$ | Dissociation of L-AMP from NC Complex        | $2.30 \cdot 10^{-5}$ | $s^{-1}$       |
| $c_{25}$ | $ki_{f2}$   | Association of Oxyluciferin to NFLuc         | $8.30 \cdot 10^6$    | $M^{-1}s^{-1}$ |
| $c_{26}$ | $ki_{r2}$   | Dissociation of Oxyluciferin from NFLuc      | $6.13 \cdot 10^{-1}$ | $s^{-1}$       |
| $c_{27}$ | $ki_{f2}^2$ | Association of L-AMP to NFLuc                | $5.00 \cdot 10^7$    | $M^{-1}s^{-1}$ |
| $c_{28}$ | $ki_{r2}^2$ | Dissociation of L-AMP from NFLuc             | $2.30 \cdot 10^{-5}$ | $s^{-1}$       |
| $c_{29}$ |             | Dark Reaction Frequency                      | $2.87 \cdot 10^{-1}$ |                |
| $c_{30}$ |             | Heat Degradation                             | $1.00 \cdot 10^{-3}$ | $s^{-1}$       |
